# Supplementary material for: circROBO1 promotes prostate cancer growth and enzalutamide resistance via accelerating glycolysis
Source: PubMed Central journal article supplement (PMC10475366; doi:10.7150/jca.86940), 2023-08-21
Supplement: jcav14p2574s1.pdf [file jcav14p2574s1.pdf]

Supplementary Table 1: The detailed clinic parameters of the enrolled patients in this study.

| Patients   | Age | T stage | N stage | M stage | Gleason score |
|------------|-----|---------|---------|---------|---------------|
| Patient 1  | 65  | T2      | N0      | M0      | 7             |
| Patient 2  | 62  | T4      | N1      | M0      | Unknown       |
| Patient 3  | 73  | T1      | N0      | M0      | 7             |
| Patient 4  | 68  | T2      | N1      | M0      | 8             |
| Patient 5  | 72  | T3      | N1      | M0      | Unknown       |
| Patient 6  | 70  | T4      | N1      | M0      | 9             |
| Patient 7  | 68  | T3      | N1      | M0      | 8             |
| Patient 8  | 75  | T3      | N0      | M0      | Unknown       |
| Patient 9  | 77  | T1      | N0      | M0      | Unknown       |
| Patient 10 | 79  | T3      | N1      | M0      | 10            |

Supplementary Table 2: The sequences of the primers used in this study.

| Target     | Direction | 5' to 3'                |
|------------|-----------|-------------------------|
| circROBO1  | F         | GCTGGTGACATGGGTTTCATACA |
| circROBO1  | R         | AAATGGTGGGCTCAGGATGG    |
| ROBO1      | F         | GGGACCCTATTTCCACTCCC    |
| ROBO1      | R         | GGGAGCCTGAACAGAGACAT    |
| beta-actin | F         | ACAAC TTTGGTATCGTGGAAGG |
| beta-actin | R         | GCCATCACGCCACAGTTTC     |

Supplementary Table 3: The absolute expression levels of circROBO1 between normal and tumor prostate tissues.

|                | circROBO1-high | circROBO1-low | Statistical analysis |
|----------------|----------------|---------------|----------------------|
| normal tissues | N=1            | N=9           | * P<0.05             |
| tumor tissues  | N=8            | N=2           |                      |
